# Supplementary material for: Cross-language orthographic neighborhood density effects in Dutch–English and Spanish–English bilinguals
Source: Frontiers journal article supplement (doi:10.3389/flang.2024.1482861), 2024-12-11
Supplement: Data_Sheet_1.docx [file Data_Sheet_1.docx]

**Appendices**

**Appendix A: short version of the Language Experience and Proficiency questionnaire (LEAP, modified short version, Marian et al., 2007):**

Please list all the languages you know in order of dominance.

1. Please list all the languages you know in order of acquisition (your native language first)
2. Please list the percentage of time you are currently and on average exposed to each language.
3. When choosing to read a text available in all your languages, in what percentage of cases would you choose to read it in each of your languages? Assume that the original was written in another language, which is unknown to you. (Total must equal 100%).
4. When choosing a language to speak with a person who is equally fluent in all your languages, what percentage of time would you choose to speak each language? Please report percent of total time (total must equal 100%).
5. Please answer the following questions about yourself
   - How many years of formal education do you have?

- Age when you began reading.
- Age when you began fluent reading.

1. Please list the number of years and months you spent in each language environment.

- School
- Work environment
- Country
- Family

1. On a scale from zero to ten, please select your level of proficiency in speaking, understanding, and reading:
   1. Speak proficiently;
   2. Read proficiently;
   3. Understand proficiently

**Appendix B: Materials of Experiment 1**

Stimuli lists for Experiment 1 (English targets taken from van Heuven et al, 1998, Experiment 4: controlling for Dutch and English neighbourhood size, mean High ND ≥ 5; mean Low ND ≤ 5. Nonword stimuli used are identical to Dirix et al.’s (2017) replication:

**High ND Dutch High ND English (item n = 20):**
aunt, blue, farm, hawk, knit, left, loan, loud, maid, monk, moon, path, quit, shoe, suit, tool, verb, weak, wrap, zero

**Nonwords (item n = 20):**blag, boul, braf, dris, fram, gonk, heud, jeef, knat, meem, merd, mots, peit, piot, sluk, sols, tess, trum, vene, zork

**High ND Dutch Low ND English (item n = 20):**army, atom, bias, bird, diet, edge, germ, huge, *butt**, jerk, keen, knee, liar, *lion*,* myth, *noon*,* *nude*,* obey, poem, *poor*
(*these items were excluded for the secondary analyses (n = 15) in order to adhere to our strict N boundaries:* mean High N ≥ 5; mean Low N ≤ 5. Van Heuven et al.’s (1998) original N boundaries were 3.5 N ≥ High, and 1.15 ≤ Low).

**Nonwords (item n = 20):**bito, daus, goep, grul, heut, irok, jees, jund, jurf, kerd, keun, loga, morp, muig, nazz, noto, obel, slen, viem, woup

**Low ND Dutch High ND English (item n = 20):**bath, bomb, busy, clue, coin, desk, dial, dirt, dish, firm, grey, hurt, iron, joke, lamb, limb, loss, milk, prey, rude  **Nonwords (item n = 20):**
aute, bulf, chah, cham, clet, drid, fran, girs, jant, liry, lurd, lurp, naul, orim, pani, raut, rion, snam, vich, vorn

**Low ND Dutch Low ND English (item n = 20):**deny, duty, earl, envy, evil, folk, frog, guts, idol, kiss, okay, oral, oval, soup, true, twin, ugly, used, vein, view **Nonwords (item n = 20):**aler, arns, aurd, baun, deim, enip, fenk, jalp, jofe, kach, maup, nige, omil, paby, ridi, taur, torp, tuni, twol, vota

**Appendix C: Materials of Experiment 2**

Stimuli lists for Experiment 2 (English targets, controlling for English and Spanish neighbourhood size, mean High N ≥ 5; mean Low N ≤ 5):

**High ND Spanish High ND English (item n = 12):**sale, male, pale, pole, date, pose, bale, rate, race, pipe, lace, gate
**Nonwords (item n = 12):**pola, maso, baro, rees, dari, jurp, tago, hasp, mati, hote, shoy, doxy

**High ND Spanish Low ND English (item n = 12):**

area, vote, data, solo, echo, visa, lava, logo, gala, halo, silo, soda  **Nonwords (item n = 12):**
repo, niro, noma, resa, alth, firo, rela, vora, rofa, sema, vinc, naro

**Low ND Spanish High ND English (item n = 12):**

rope, bail, tent, rude, bond, sock, poke, pump, bite, grip, mock, leap **Nonwords (item n = 12):**hant, carm, graw, lorn, vinc, limn, shan, lisk, pred, seck, mert, basi

**Low ND Spanish Low English ND (item n = 12):**liar, loud, crib, iron, urge, desk, plug, pity, whip, chew, gasp, plum,
**Nonwords (item n = 12):**voni,asdi, mewe, tafi, tiru, resp, glan, gude, wrey, trem, rinu, loni
